# Supplementary material for: Antidepressant use during pregnancy and the risk of major congenital malformations in a cohort of depressed pregnant women: an updated analysis of the Quebec Pregnancy Cohort
Source: PubMed Central journal article supplement — BMJ Open. 2017 Jan 11;7(1):e013372. doi: 10.1136/bmjopen-2016-013372 (PMC5278249; doi:10.1136/bmjopen-2016-013372), 2017-01-11
Supplement: bmjopen-2016-013372supp_tables.pdf [file bmjopen-2016-013372supp_tables.pdf]

## **Supplementary Files**

This appendix has been provided by the authors to give readers additional information about their work.  
Supplement to: Anick Bérard, Jin-Ping Zhao, Odile Sheehy. Antidepressant use during pregnancy and the risk of major congenital malformations in a cohort of depressed pregnant women: An updated analysis of the Quebec Pregnancy Cohort.

**Table S1. ICD-9 and ICD-10 codes for diagnoses of depression and anxiety, and other cognitive disorders**

| <b>ICD-10</b>                        | <b>ICD-9</b> |
|--------------------------------------|--------------|
| <b>Episodic Mood disorders (296)</b> |              |
| F309                                 | 2960         |
| F300                                 | 2960         |
| F301                                 | 2960         |
| F308                                 | 2960         |
| F302                                 | 2960         |
| F338                                 | 2961         |
| F334                                 | 2961         |
| F333                                 | 2961         |
| F332                                 | 2961         |
| F331                                 | 2961         |
| F330                                 | 2961         |
| F328                                 | 2961         |
| F322                                 | 2961         |
| F339                                 | 2961         |
| F323                                 | 2961         |
| F310                                 | 2962         |
| F311                                 | 2962         |
| F312                                 | 2962         |
| F315                                 | 2963         |
| F314                                 | 2963         |
| F313                                 | 2963         |
| F380                                 | 2964         |
| F316                                 | 2964         |
| F317                                 | 2965         |
| F319                                 | 2965         |
| F318                                 | 2966         |
| F381                                 | 2966         |
| F319                                 | 2967         |
| F317                                 | 2967         |
| F348                                 | 2968         |
| F388                                 | 2968         |
| F349                                 | 2969         |
| F39                                  | 2969         |
| <b>Neurotic disorders (300)</b>      |              |
| F410                                 | 3000         |
| F413                                 | 3000         |
| F418                                 | 3000         |
| F411                                 | 3000         |
| F419                                 | 3000         |
| F447                                 | 3001         |
| F448                                 | 3001         |
| F445                                 | 3001         |
| F446                                 | 3001         |
| F449                                 | 3001         |
| F444                                 | 3001         |
| F680                                 | 3001         |
| F440                                 | 3001         |
| F443                                 | 3001         |
| F442                                 | 3001         |
| F441                                 | 3001         |
| F402                                 | 3002         |

**Table S1. ICD-9 and ICD-10 codes for diagnoses of depression and anxiety, and other cognitive disorders**

| <b>ICD-10</b>                                        | <b>ICD-9</b> |
|------------------------------------------------------|--------------|
| F401                                                 | 3002         |
| F400                                                 | 3002         |
| F408                                                 | 3002         |
| F409                                                 | 3002         |
| F429                                                 | 3003         |
| F428                                                 | 3003         |
| F422                                                 | 3003         |
| F420                                                 | 3003         |
| F421                                                 | 3003         |
| F320                                                 | 3004         |
| F480                                                 | 3005         |
| F480                                                 | 3005         |
| F481                                                 | 3006         |
| F452                                                 | 3007         |
| F450                                                 | 3008         |
| F488                                                 | 3008         |
| F451                                                 | 3008         |
| F99                                                  | 3009         |
| F489                                                 | 3009         |
| <b>Adjustment reaction (309)</b>                     |              |
| F432                                                 | 3090         |
| F930                                                 | 3092         |
| F438                                                 | 3098         |
| <b>Depressive disorder, not elsewhere classified</b> |              |
| F530                                                 | 3119         |
| F329                                                 | 3119         |

ICD-9, International Classification of Diseases, Ninth Revision;  
ICD-10, International Classification of Diseases, 10<sup>th</sup> Revision.

---

**Table S2. Antidepressant Medications**

---

| <b>Antidepressant Medication Class</b> | <b>Antidepressant Generic Name</b>                                                                     |
|----------------------------------------|--------------------------------------------------------------------------------------------------------|
| SSRI                                   | Citalopram<br>Fluoxetine<br>Fluvoxamine<br>Paroxetine<br>Sertraline                                    |
| SNRI                                   | Venlafaxine                                                                                            |
| TCA                                    | Amitriptyline<br>Clomipramine<br>Desipramine<br>Doxepin<br>Imipramine<br>Nortriptyline<br>Trimipramine |
| Bupropion                              | Bupropion excluding Zyban                                                                              |
| Other                                  | Bupirone<br>Mirtazapine<br>Trazodone<br>Moclobémide<br>L-tryptophane                                   |

---

SNRI, serotonin-norepinephrine reuptake inhibitor; SSRI, selective serotonin reuptake inhibitor, TCA, tricyclic antidepressant.

**Table S3. ICD-9 and ICD-10 Diagnostic codes used to identify major congenital malformation by organ system.**

| <b>Congenital malformation</b>         | <b>ICD-9 diagnostic codes</b>                                                                                                                                                    | <b>ICD-10 diagnostic codes</b>                                                                                                                                                             |
|----------------------------------------|----------------------------------------------------------------------------------------------------------------------------------------------------------------------------------|--------------------------------------------------------------------------------------------------------------------------------------------------------------------------------------------|
| Major congenital malformations overall | 740-759 excluding minor congenital malformations<br>(743.6, 744.1, 744.2-744.4, 744.8, 744.9, 747.0, 747.5, 750.0, 752.4, 752.5, 754.6, 755.0, 755.1, 757.2-757.6, 757.8, 757.9) | Q00-Q89 excluding minor congenital malformations (Q10, Q162, Q17-Q182, Q184-Q189, Q250, Q270, Q381, Q515, Q516, Q520-Q527, Q53, Q664-Q666, Q69, Q70, Q81-Q84, Q950-Q952, Q954, Q955, Q959) |
| Nervous system                         | 740-742                                                                                                                                                                          | Q00-Q07                                                                                                                                                                                    |
| Eye, ear, face and neck                | 743-744                                                                                                                                                                          | Q10-Q18                                                                                                                                                                                    |
| Circulatory system                     | 745-747                                                                                                                                                                          | Q20-Q28                                                                                                                                                                                    |
| Respiratory system                     | 748                                                                                                                                                                              | Q30-Q34                                                                                                                                                                                    |
| Digestive system                       | 749-751                                                                                                                                                                          | Q35-Q45                                                                                                                                                                                    |
| Genital organs                         | 752                                                                                                                                                                              | Q50-Q56                                                                                                                                                                                    |
| Urinary system                         | 753                                                                                                                                                                              | Q60-Q64                                                                                                                                                                                    |
| Musculoskeletal system                 | 754-756                                                                                                                                                                          | Q65-Q79                                                                                                                                                                                    |
| Other congenital malformations         | 757 and 759                                                                                                                                                                      | Q80-Q89                                                                                                                                                                                    |
| Cardiac malformations                  | 745-746                                                                                                                                                                          | Q20-Q22                                                                                                                                                                                    |
| Ventricular/atrial septal defect       | 745.4 and 745.5                                                                                                                                                                  | Q21.0-Q21.2                                                                                                                                                                                |
| Omphalocele                            | 756.7                                                                                                                                                                            | Q79.2                                                                                                                                                                                      |
| Craniosynostosis                       | 756.0                                                                                                                                                                            | Q75                                                                                                                                                                                        |
| Cleft palate                           | 749                                                                                                                                                                              | Q35-Q37                                                                                                                                                                                    |

ICD-9, International Classification of Disease, Ninth Revision; ICD-10, International Classification of Disease, 10<sup>th</sup> Revision.

**Table S4. ICD-9 and ICD-10 codes as well as medication codes for diagnoses of comorbidities: hypertension, diabetes, asthma, thyroid disease.**

### **Hypertension**

ICD-9 codes: 4010-4059, 6420-6429 and 7962

ICD-10 codes: I100, I101, I150, I151, I152, I158, I159, O10, O11, O12, O13, O14, O15 and O16

Medication generic codes: 10751, 6136, 4524, 41564, 45625, 37742, 45520, 45463, 43670, 46325, 46315, 47355, 47199, 46319, 45243, 38275, 46763, 46780, 40563, 42162, 39016, 45408, 8229, 44866, 38314, 47006, 45624, 42708, 46388, 46469, 47751, 45532, 43228, 47247, 40550, 46573, 47440, 47049, 42071, 47056, 47320, 45476, 45572, 47002, 45576, 47040, 47117, 46258, 47449, 45629, 47301, 47079, 46216, 47655, 47250, 46529, 47309, 46760, 47412, 47389, 47534, 47532, 46459, 47282, 47354, 47135, 46284, 46441, 47207, 47763, 47764, 47333, 46587, 47413, 46418, 47259, 47369, 9100, 46572, 3562, 4173, 41759, 41772, 4537, 1976, 43397, 19440, 41772, 38158, 38197, 9763, 47609, 47706, 47823 with formulation not in the following codes: 1479, 1624, 2204, 2233, 2784, 2813, 3480, 5365, 5599

### **Diabetes**

ICD-9 codes: 2500-2509, 2714 and 7902

ICD-10 codes: E10-E14 and R730

Medication generic codes: 47151, 46300, 5824, 47208, 47357, 46568, 46810, 1937, 4264, 47427, 46799, 46056, 47329, 15184, 9672, 4238, 47429, 46678, 47392, 46642, 47371, 47715, 46862, 47652, 46798, 47424, 46322, 47206, 44164, 45511, 45531, 47615, 47586, 47536, 47426, 4832, 4888, 18296, 18309, 39484, 18322, 39497, 18335, 18348, 39458, 39120, 46538, 39133, 46537, 39146, 39159, 39172, 39185, 46536, 39523, 43735, 41655, 43033, 44151, 44476, 44489, 44502, 44996, 45405, 45534, 45415, 45483, 45535, 46592, 46602, 46603, 46607, 47004

### **Asthma**

ICD-9 codes : 4930, 4931, 4933, 4934, 4935, 4936, 4937, 4938 and 4939

ICD-10 codes: J450, J458, J451 and J459

Medication generic codes: 364, 46428, 47428, 46800, 39419, 47315, 2223, 3380, 3406, 3419, 38548, 47231, 47271, 46430, 43124, 46640, 47186, 46302, 5083, 5096, 5109, 5070, 45555, 46752, 47303, 47302, 46467, 47033, 45563, 46463, 6721, 43475, 47153, 46299, 45547, 10530, 33634, 46737, 47335, 46597, 47112, 46247, 34180, 9464, 46847, 9490, 9503, 44944, 47266, 46401, 47428, 45581 or 780, 45499, 38730, 47213, 47050, 46435, 9737, 47626 with formulation in the following codes: 1305, 1334, 1856, 1885, 1972, 2610, 2639, 5563, 5564, 5584, 5619, 5634, 5563

### **Thyroid diseases**

ICD-9 codes : 2440-2449 and 2429

ICD-10 codes : E01, E02, E03 and E05

Medication generic codes: 5252, 46574, 5317, 46457, 46474, 33842, 40836 and 8242

| Table S5. Comparisons between pregnancies included and excluded in the study. | Pregnancies not meeting eligibility criteria: |                                                                                  |                               |                                                  |                                                                       |                                        |                                  |
|-------------------------------------------------------------------------------|-----------------------------------------------|----------------------------------------------------------------------------------|-------------------------------|--------------------------------------------------|-----------------------------------------------------------------------|----------------------------------------|----------------------------------|
|                                                                               | Study population<br>n=18,487                  | More than one antidepressants used during the 1 <sup>st</sup> trimester<br>n=529 | Multiple pregnancies<br>n=186 | Unmatched pregnancies with ISQ database<br>n=954 | Fetotoxic drug exposure during the 1 <sup>st</sup> trimester<br>n=552 | Chromosomal abnormalities only<br>n=42 | Minor birth defect only<br>n=425 |
| <b>Characteristics</b>                                                        | <b>No. (%)</b>                                |                                                                                  |                               |                                                  |                                                                       |                                        |                                  |
| <b>Measured on the first day of gestation:</b>                                |                                               |                                                                                  |                               |                                                  |                                                                       |                                        |                                  |
| Maternal age (years), mean ( $\pm$ SD)                                        | 27.8 $\pm$ 5.7                                | 29.3 $\pm$ 5.7                                                                   | 28.5 $\pm$ 5.6                | 28.2 $\pm$ 6.0                                   | 29.4 $\pm$ 6.2                                                        | 29.1 $\pm$ 6.7                         | 27.7 $\pm$ 5.4                   |
| Urban dweller, n (%)                                                          | 15,382 (83.2)                                 | 459 (86.8)                                                                       | 158 (85.0)                    | 836 (84.6)                                       | 452 (81.9)                                                            | 33 (78.6)                              | 356 (83.8)                       |
| Welfare recipient, n (%)                                                      | 6,169 (33.4)                                  | 281 (53.1)                                                                       | 75 (40.3)                     | 431 (45.2)                                       | 256 (46.4)                                                            | 17 (40.4)                              | 149 (35.0)                       |

**Table S6. List of fetotoxic drug used in those excluded from the study population.**

|                          | Number of pregnancies exposed |
|--------------------------|-------------------------------|
| <b>Medication</b>        |                               |
| Valproic acid divalproex | 135                           |
| Lithium                  | 99                            |
| Carbamazepine            | 68                            |
| Clomiphene               | 60                            |
| Misoprostol              | 29                            |
| Atorvastatin             | 28                            |
| Phenytoin                | 21                            |
| Conjugated estrogens     | 12                            |
| Propylthiouracil         | 11                            |
| Warfarine                | 11                            |
| Pravastatine             | 10                            |
| Ramipril                 | 9                             |
| Irbesartan               | 7                             |
| Enalapril                | 6                             |
| Methimazole              | 6                             |
| Vitamin A                | 6                             |
| Candesartan              | 5                             |
| Cilazapril               | 5                             |
| Perindopril              | 5                             |
| Phenobarbital            | 5                             |
| Quinalapril              | 5                             |
| Valsartan                | 5                             |
| Dihydroergotamine        | 4                             |
| Losatan/HCTZ             | 4                             |
| Quinine                  | 4                             |
| Simvastatine             | 4                             |
| Amethopterine            | 3                             |
| Fosinopril               | 3                             |
| Isotretinoin             | 3                             |
| Leuprolide               | 3                             |
| Telmisartan              | 3                             |
| Acitretin                | 2                             |
| Cerivastatin             | 2                             |
| Irbesartan/HCTZ          | 2                             |
| Lisinopril               | 2                             |
| Losartan                 | 2                             |
| Lovastatine              | 2                             |
| Rovustatine              | 2                             |
| Valsartan/HCTZ           | 2                             |
| Candersartan/HCTZ        | 1                             |

|                 |   |
|-----------------|---|
| Cilazapril/HCTZ | 1 |
| Fluvastatin     | 1 |
| Fourouracil     | 1 |
| Penicillamine   | 1 |
| Testosterone    | 1 |
| Trandopril      | 1 |

---

Note: 552 pregnancies were excluded from the study population because of exposures to fetotoxic drugs during the first trimester (see Figure 1). Given that some pregnancies were exposed to more than one fetotoxic drugs, the total exceeds 552.



**TABLE S7.** Type of antidepressant use during the 1<sup>st</sup> trimester of pregnancy and the risk of major congenital malformations as well as organ specific malformations in a cohort of depressed pregnant women using 95% and 99% confidence intervals.

| Congenital malformations               |                           | Crude Prevalence    | Adjusted* Prevalence |                  |             |
|----------------------------------------|---------------------------|---------------------|----------------------|------------------|-------------|
|                                        |                           | Odds Ratio (95% CI) | Odds Ratio (95% CI)  | (99% CI)         |             |
| Major congenital malformations overall | Non exposed               | 1.00                | 1.00                 |                  |             |
|                                        | Paroxetine                | 1.39 (1.15-1.68)    | 1.24 (0.99-1.55)     | (0.79-1.66)      |             |
|                                        | Sertraline                | 1.13 (0.83-1.55)    | 1.09 (0.80-1.50)     | (0.72-1.66)      |             |
|                                        | Citalopram                | 1.41 (1.11-1.78)    | 1.36 (1.08-1.73)     | (1.00-1.86)      |             |
|                                        | Fluoxetine                | 0.83 (0.51-1.35)    | 0.80 (0.49-1.31)     | (0.42-1.53)      |             |
|                                        | Fluvoxamine               | 0.63 (0.23-1.75)    | 0.63 (0.23-1.77)     | (0.16-2.44)      |             |
|                                        | Venlafaxine               | 1.12 (0.89-1.41)    | 1.10 (0.87-1.38)     | (0.81-1.48)      |             |
|                                        | Tricyclic antidepressants | 1.23 (0.91-1.67)    | 1.16 (0.86-1.56)     | (0.78-1.72)      |             |
|                                        | Other antidepressants     | 0.96 (0.61-1.52)    | 0.93 (0.59-1.47)     | (0.51-1.70)      |             |
|                                        | Nervous system            | Non exposed         | 1.00                 | 1.00             |             |
| Paroxetine                             |                           | 1.37 (0.75-2.49)    | 1.34 (0.74-2.42)     | (0.31-2.93)      |             |
| Sertraline                             |                           | 1.79 (0.73-4.38)    | 1.72 (0.69-4.26)     | (0.52-5.69)      |             |
| Citalopram                             |                           | 1.32 (0.57-3.02)    | 1.28 (0.55-2.93)     | (0.43-3.82)      |             |
| Fluoxetine                             |                           | 0.68 (0.10-4.80)    | 0.64 (0.09-4.52)     | (0.05-8.40)      |             |
| Fluvoxamine                            |                           | 2.39 (0.33-17.05)   | 2.44 (0.33-18.11)    | (0.18-34.12)     |             |
| Venlafaxine                            |                           | 1.20 (0.55-2.59)    | 1.19 (0.55-2.58)     | (0.43-3.30)      |             |
| Tricyclic antidepressants              |                           | 0.68 (0.17-2.72)    | 0.60 (0.15-2.38)     | (0.10-3.69)      |             |
| Other antidepressants                  |                           | 1.34 (0.33-5.40)    | 1.21 (0.30-4.89)     | (0.19-7.60)      |             |
| Eye, ear, face and neck                |                           | Non exposed         | 1.00                 | 1.00             |             |
|                                        | Paroxetine                | 0.76 (0.31-1.88)    | 0.75 (0.30-1.86)     | (0.23-2.48)      |             |
|                                        | Sertraline                | 0.47 (0.07-3.40)    | 0.44 (0.06-3.18)     | (0.03-5.96)      |             |
|                                        | Citalopram                | 1.18 (0.43-3.23)    | 1.13 (0.41-3.09)     | (0.30-4.25)      |             |
|                                        | Fluoxetine                | 0.91 (0.13-6.47)    | 0.85 (0.12-5.94)     | (0.07-11.00)     |             |
|                                        | Venlafaxine               | 0.70 (0.22-2.22)    | 0.70 (0.22-2.19)     | (0.15-3.16)      |             |
|                                        | Tricyclic antidepressants | 2.74 (1.19-6.30)    | 2.45 (1.05-5.72)     | (0.80-7.48)      |             |
|                                        | Other antidepressants     | 1.80 (0.44-7.36)    | 1.71 (0.41-7.15)     | (0.26-11.23)     |             |
|                                        | Circulatory system        | Non exposed         | 1.00                 | 1.00             |             |
|                                        |                           | Paroxetine          | 1.17 (0.83-1.65)     | 1.13 (0.79-1.60) | (0.71-1.79) |
| Sertraline                             |                           | 1.31 (0.75-2.30)    | 1.25 (0.71-2.19)     | (0.60-2.61)      |             |
| Citalopram                             |                           | 1.31 (0.84-2.06)    | 1.27 (0.81-1.99)     | (0.70-2.30)      |             |
| Fluoxetine                             |                           | 0.56 (0.18-1.76)    | 0.52 (0.16-1.65)     | (0.11-2.38)      |             |
| Fluvoxamine                            |                           | 2.06 (0.64-6.61)    | 2.00 (0.62-6.47)     | (0.42-9.39)      |             |
| Venlafaxine                            |                           | 0.78 (0.47-1.30)    | 0.77 (0.46-1.27)     | (0.39-1.49)      |             |
| Tricyclic antidepressants              |                           | 1.04 (0.56-1.91)    | 0.96 (0.52-1.77)     | (0.43-2.15)      |             |
| Other antidepressants                  |                           | 0.94 (0.38-2.31)    | 0.88 (0.36-2.13)     | (0.27-2.82)      |             |

|                        |                           |                  |                  |              |
|------------------------|---------------------------|------------------|------------------|--------------|
| Respiratory system     | Non exposed               | 1.00             | 1.00             |              |
|                        | Paroxetine                | 0.98 (0.43-2.23) | 0.95 (0.41-2.21) | (0.32-2.88)  |
|                        | Fluoxetine                | 1.93 (0.47-7.90) | 1.93 (0.47-7.85) | (0.30-12.24) |
|                        | Venlafaxine               | 2.25 (1.13-4.50) | 2.17 (1.07-4.38) | (0.86-5.48)  |
|                        | Tricyclic antidepressants | 0.96 (0.24-3.91) | 0.90 (0.22-3.61) | (0.14-5.62)  |
|                        | Other antidepressants     | 1.91 (0.47-7.82) | 1.79 (0.44-7.32) | (0.28-11.42) |
| Digestive system       | Non exposed               | 1.00             | 1.00             |              |
|                        | Paroxetine                | 0.97 (0.55-1.71) | 0.96 (0.54-1.71) | (0.45-2.05)  |
|                        | Sertraline                | 1.15 (0.47-2.83) | 1.13 (0.46-2.77) | (0.35-3.68)  |
|                        | Citalopram                | 1.16 (0.57-2.37) | 1.13 (0.55-2.32) | (0.44-2.91)  |
|                        | Fluoxetine                | 0.88 (0.22-3.58) | 0.87 (0.21-3.56) | (0.14-5.55)  |
|                        | Venlafaxine               | 0.91 (0.45-1.85) | 0.89 (0.44-1.83) | (0.35-2.29)  |
|                        | Tricyclic antidepressants | 2.70 (1.49-4.89) | 2.55 (1.40-4.66) | (1.16-5.63)  |
|                        | Other antidepressants     | 0.44 (0.06-3.10) | 0.42 (0.06-2.98) | (0.03-5.55)  |
| Genital organs         | Non exposed               | 1.00             | 1.00             |              |
|                        | Paroxetine                | 0.80 (0.42-1.53) | 0.79 (0.41-1.52) | (0.33-1.87)  |
|                        | Sertraline                | 0.97 (0.35-2.72) | 0.90 (0.31-2.61) | (0.22-3.65)  |
|                        | Citalopram                | 0.93 (0.41-2.13) | 0.86 (0.37-1.99) | (0.28-2.60)  |
|                        | Fluoxetine                | 0.50 (0.07-3.45) | 0.50 (0.07-3.35) | (0.04-6.14)  |
|                        | Venlafaxine               | 0.74 (0.30-1.81) | 0.69 (0.29-1.67) | (0.22-2.21)  |
|                        | Tricyclic antidepressants | 1.24 (0.51-3.01) | 1.12 (0.46-2.72) | (0.35-3.60)  |
|                        | Other antidepressants     | 0.91 (0.23-3.58) | 0.83 (0.21-3.27) | (0.14-5.05)  |
| Urinary system         | Non exposed               | 1.00             | 1.00             |              |
|                        | Paroxetine                | 0.46 (0.19-1.13) | 0.47 (0.19-1.14) | (0.15-1.51)  |
|                        | Sertraline                | 0.86 (0.27-2.73) | 0.86 (0.27-2.71) | (0.19-3.91)  |
|                        | Citalopram                | 0.18 (0.03-1.28) | 0.18 (0.02-1.26) | (0.01-2.35)  |
|                        | Fluoxetine                | 0.55 (0.08-3.94) | 0.56 (0.08-4.00) | (0.04-7.46)  |
|                        | Venlafaxine               | 1.43 (0.75-2.73) | 1.43 (0.75-2.73) | (0.61-3.34)  |
|                        | Tricyclic antidepressants | 0.83 (0.26-2.60) | 0.80 (0.25-2.57) | (0.17-3.72)  |
|                        | Other antidepressants     | 0.54 (0.08-3.91) | 0.54 (0.08-3.86) | (0.04-7.19)  |
| Musculoskeletal system | Non exposed               | 1.00             | 1.00             |              |
|                        | Paroxetine                | 1.02 (0.75-1.37) | 1.01 (0.75-1.37) | (0.68-1.51)  |
|                        | Sertraline                | 1.06 (0.64-1.76) | 1.03 (0.62-1.71) | (0.53-2.01)  |
|                        | Citalopram                | 1.96 (1.44-2.68) | 1.92 (1.40-2.62) | (1.27-2.89)  |
|                        | Fluoxetine                | 1.00 (0.49-2.04) | 0.99 (0.48-2.01) | (0.39-2.52)  |
|                        | Fluvoxamine               | 0.88 (0.21-3.58) | 0.87 (0.21-3.57) | (0.14-5.56)  |
|                        | Venlafaxine               | 1.32 (0.95-1.84) | 1.30 (0.93-1.80) | (0.84-2.00)  |
|                        | Tricyclic antidepressants | 0.88 (0.51-1.51) | 0.84 (0.49-1.44) | (0.41-1.71)  |
|                        | Other antidepressants     | 0.85 (0.40-1.83) | 0.83 (0.39-1.80) | (0.30-2.29)  |
| Cardiac malformations  | Non exposed               | 1.00             | 1.00             |              |
|                        | Paroxetine                | 1.49 (1.11-2.00) | 1.45 (1.12-1.88) | (0.87-2.03)  |

|                                  |                           |                  |                  |              |
|----------------------------------|---------------------------|------------------|------------------|--------------|
|                                  | Sertraline                | 1.19 (0.63-2.25) | 1.14 (0.60-2.15) | (0.49-2.63)  |
|                                  | Citalopram                | 1.18 (0.71-1.97) | 1.15 (0.69-1.92) | (0.59-2.25)  |
|                                  | Fluoxetine                | 0.45 (0.11-1.82) | 0.42 (0.10-1.73) | (0.07-2.71)  |
|                                  | Fluvoxamine               | 2.45 (0.76-7.87) | 2.44 (0.75-7.95) | (0.52-11.54) |
|                                  | Venlafaxine               | 0.81 (0.47-1.40) | 0.80 (0.47-1.38) | (0.39-1.64)  |
|                                  | Tricyclic antidepressants | 1.12 (0.59-2.13) | 1.05 (0.55-1.99) | (0.45-2.44)  |
|                                  | Other antidepressants     | 0.89 (0.33-2.42) | 0.84 (0.31-2.27) | (0.23-3.10)  |
| Ventricular/atrial septal defect | Non exposed               | 1.00             | 1.00             |              |
|                                  | <b>Paroxetine</b>         | 1.43 (1.17-1.75) | 1.39 (1.00-1.93) | (0.64-2.12)  |
|                                  | Sertraline                | 1.36 (0.69-2.65) | 1.33 (0.68-2.60) | (0.55-3.21)  |
|                                  | Citalopram                | 1.41 (0.83-2.39) | 1.39 (0.82-2.36) | (0.69-2.79)  |
|                                  | Fluoxetine                | 0.57 (0.14-2.30) | 0.55 (0.14-2.27) | (0.09-3.55)  |
|                                  | Fluvoxamine               | 2.03 (0.49-8.36) | 2.10 (0.51-8.71) | (0.32-13.66) |
|                                  | Venlafaxine               | 0.74 (0.39-1.39) | 0.73 (0.39-1.39) | (0.32-1.70)  |
|                                  | Tricyclic antidepressants | 1.14 (0.56-2.32) | 1.10 (0.54-2.24) | (0.43-2.81)  |
|                                  | Other antidepressants     | 1.14 (0.42-3.08) | 1.11 (0.41-2.97) | (0.30-4.06)  |
| Cranyosynostosis                 | Non exposed               | 1.00             | 1.00             |              |
|                                  | Paroxetine                | 1.44 (0.69-2.99) | 1.53 (0.72-3.25) | (0.57-4.12)  |
|                                  | Sertraline                | 2.24 (0.82-6.16) | 2.29 (0.83-6.36) | (0.60-8.78)  |
|                                  | Citalopram                | 3.89 (2.06-7.35) | 3.95 (2.08-7.52) | (1.69-9.22)  |
|                                  | Fluoxetine                | 1.07 (0.15-7.65) | 1.14 (0.16-8.21) | (0.08-15.35) |
|                                  | Venlafaxine               | 1.38 (0.56-3.43) | 1.41 (0.57-3.52) | (0.42-4.70)  |
|                                  | Tricyclic antidepressants | 1.06 (0.26-4.36) | 1.05 (0.25-4.37) | (0.16-6.88)  |
|                                  | Other antidepressants     | 1.05 (0.15-7.63) | 1.15 (0.16-8.42) | (0.08-15.82) |

Note: Ventricular/atrial septal defects are a sub-set of cardiac malformations; Results are provided when defects were identified for the antidepressant type in the study population (if 0 outcome identified).

\*Adjusted for maternal age, welfare status, diabetes, hypertension, asthma and other medication uses including benzodiazepines as well as health care utilization in the year prior and during the first trimester.

**Table S8.1.** Results of the probabilistic sensitivity analyses correcting for misclassification of antidepressant exposure during the first trimester and the risk of major congenital malformation with sensitivity and specificity drawn from trapezoidal distribution

| <b>Analysis</b>                              | <b>OR 2.5 percentile</b> | <b>OR median estimate</b> | <b>OR 97.5 percentile</b> |
|----------------------------------------------|--------------------------|---------------------------|---------------------------|
| <b>Conventional analysis</b>                 | 0.99                     | 1.11                      | 1.25                      |
| <b>Non-differential sensitivity analysis</b> |                          |                           |                           |
| Sensitivity only                             | 1.09                     | 1.23                      | 4.11                      |
| Sensitivity and random error                 | 1.04                     | 1.25                      | 4.03                      |

**Table S8.2.** Results of the probabilistic sensitivity analyses correcting for misclassification of major congenital malformation during the first 6 months of baby's life and the probability to be exposed to antidepressant medications during the first trimester with sensitivity and specificity drawn from trapezoidal distribution

| <b>Analysis</b>                          | <b>OR 2.5 percentile</b> | <b>OR median estimate</b> | <b>OR 97.5 percentile</b> |
|------------------------------------------|--------------------------|---------------------------|---------------------------|
| <b>Conventional analysis</b>             | 0.99                     | 1.11                      | 1.25                      |
| <b>Differential sensitivity analysis</b> |                          |                           |                           |
| Sensitivity only                         | 0.43                     | 3.70                      | 55.15                     |
| Sensitivity and random error             | 0.43                     | 3.72                      | 54.06                     |
